# Supplementary material for: Core–shell and alloy integrating PdAu bimetallic nanoplates on reduced graphene oxide for efficient and stable hydrogen evolution catalysts
Source: Royal Society of Chemistry journal article supplement (doi:10.1039/c7ra08517f), 2017-01-01
Supplement: c7ra08517f1.pdf [file c7ra08517f1.pdf]

## Supporting Information

### **Core-shell and alloy integrating PdAu bimetallic nanoplates on reduced graphene oxide for efficient and stable hydrogen evolution catalysts**

Yi Jiang, Yucong Yan, Yu Han, Hui Zhang,\* and Deren Yang

State Key Laboratory of Silicon Materials, School of Materials Science & Engineering, ,  
Zhejiang University, Hangzhou, Zhejiang 310027, People's Republic of China. Email:  
msezhanghui@zju.edu.cn

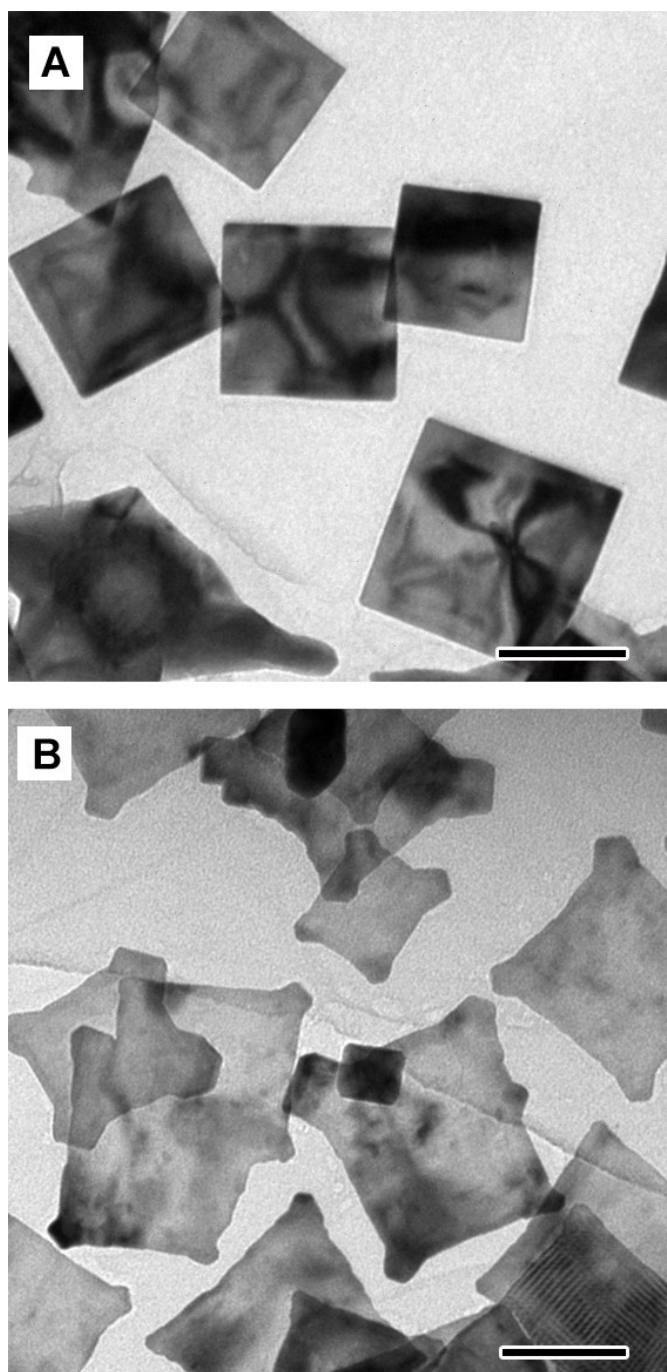

**Fig. S1** TEM images of (A) PdAu@rGO-1 prepared using the standard procedure at a high injection rate of the Au precursor (e.g., 45 mL/min) (B) PdAu@rGO-2 prepared using the standard procedure at a slow injection rate of the Au precursor (e.g., 0.5 mL/min). The scale bars are 100 nm.

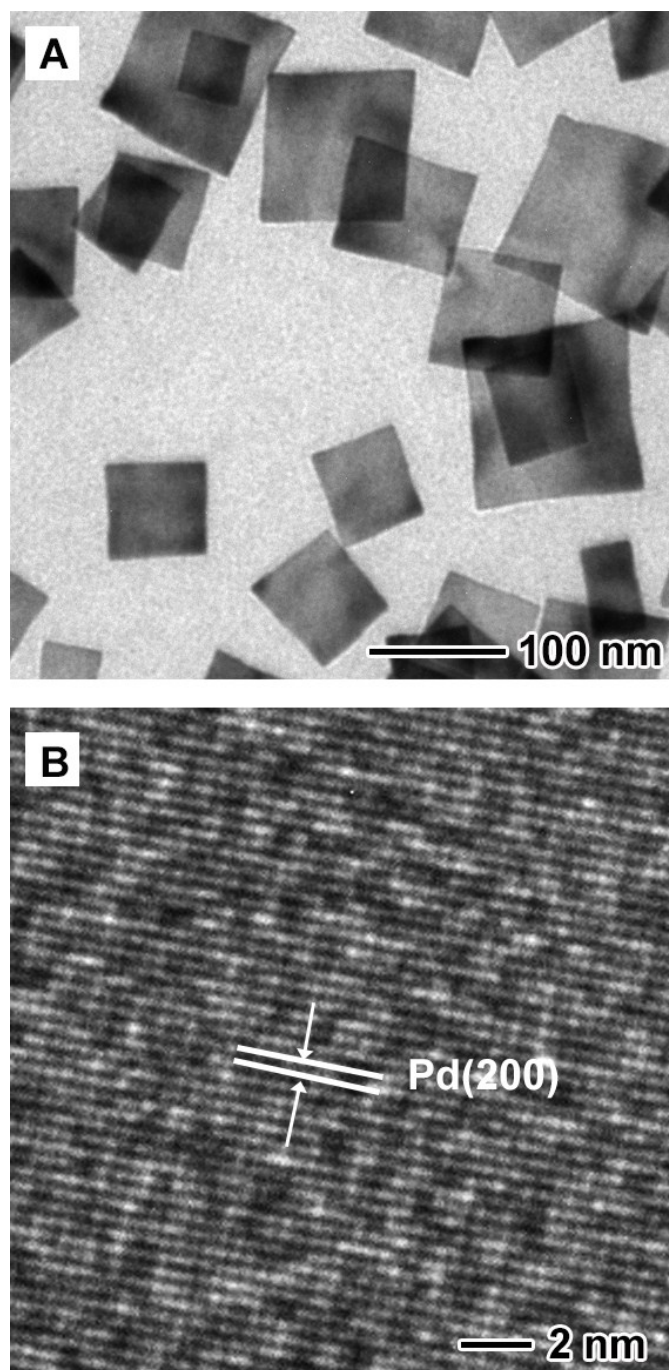

**Fig. S2** (A) TEM and (B) HRTEM images of PdSP@rGO prepared using the standard procedure before  $\text{HAuCl}_4$  being added.

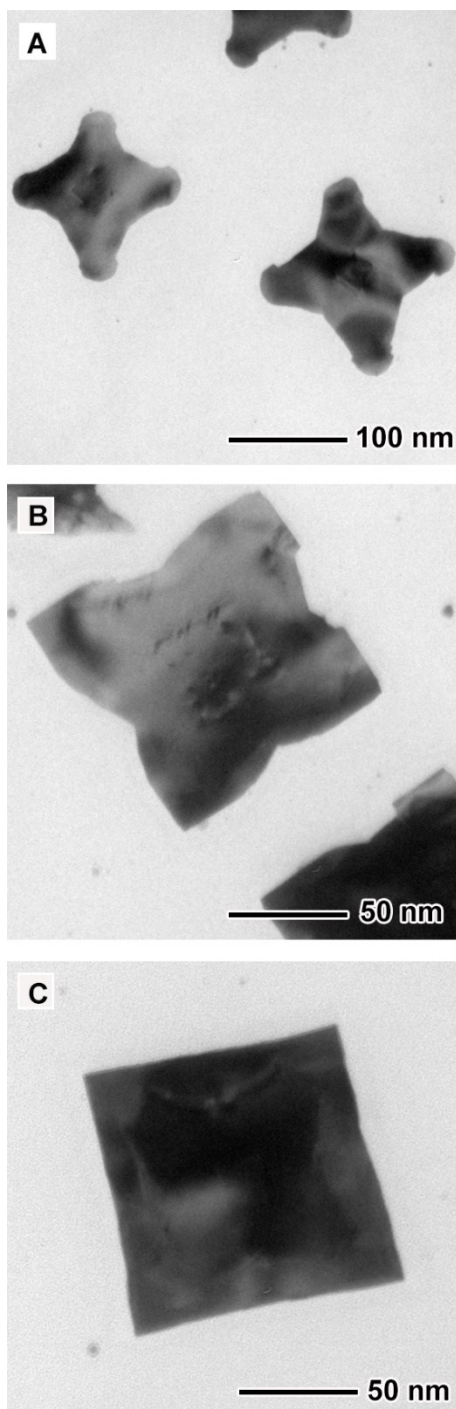

**Fig. S3** TEM images of a series of samples for the synthesis of PdAu@rGO-1 at different reaction times after the injection of H<sub>Au</sub>Cl<sub>4</sub> solution at a high rate: (A) 1, (B) 5, and (C) 10 min.

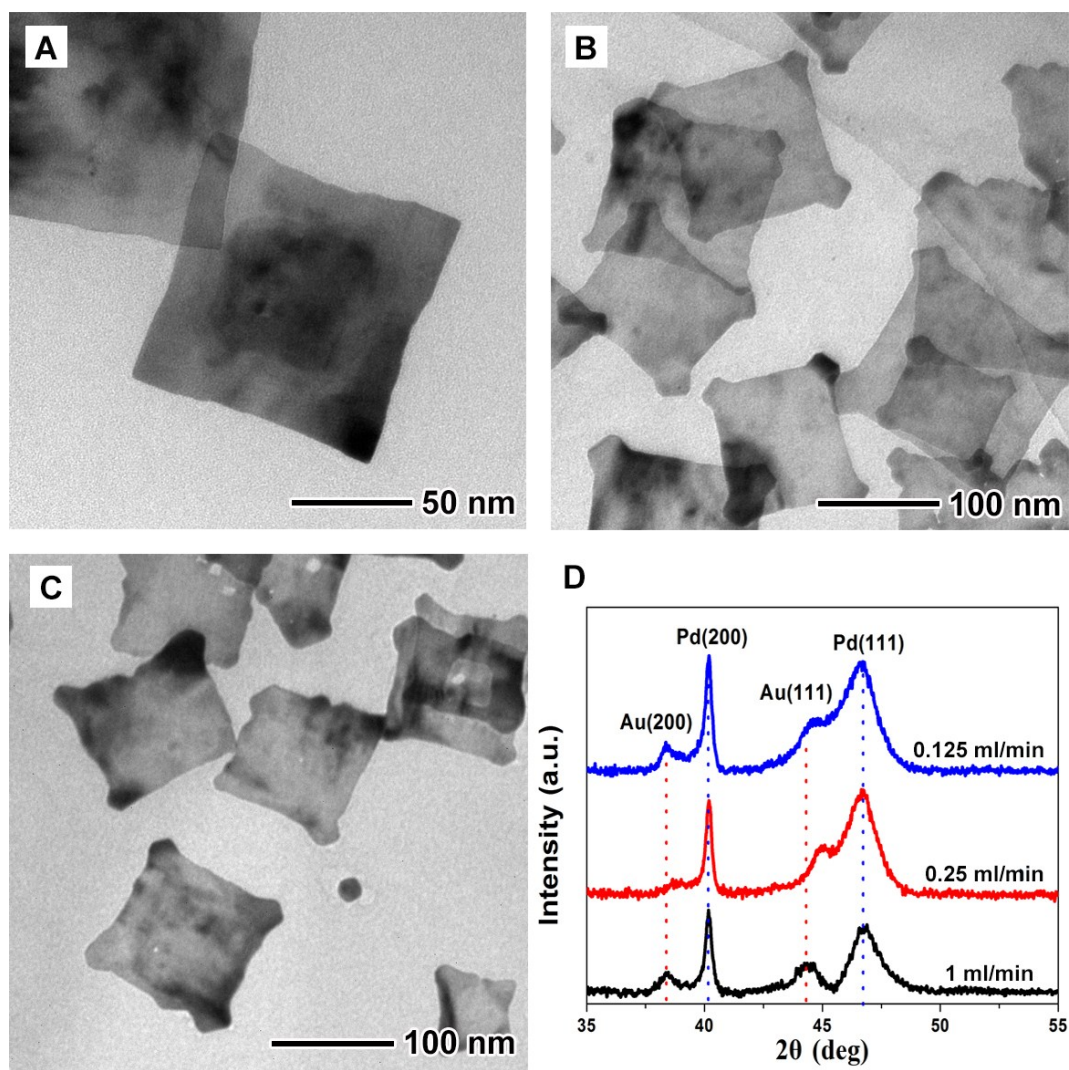

**Fig. S4** TEM images of the samples prepared using the standard procedure by varying the injection rate of  $\text{HAuCl}_4$ : (A) 1, (B) 0.25, and (C) 0.125 mL/min. (D) The corresponding XRD patterns of these three samples.

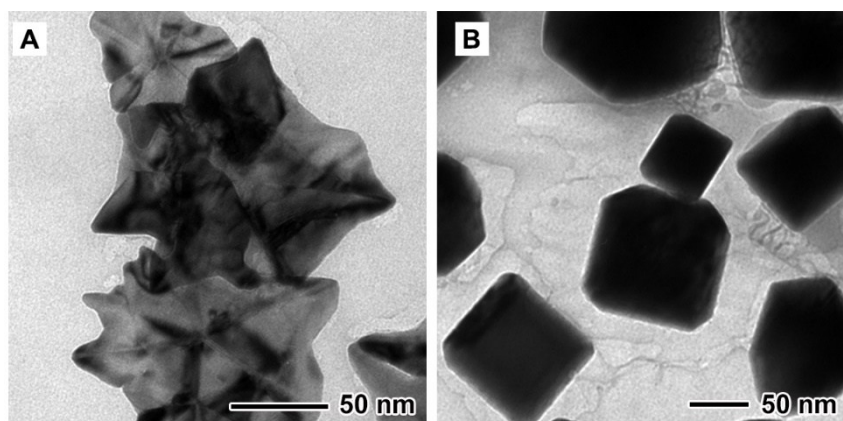

**Fig. S5** PdAu bimetallic nanoplate synthesized by standard procedure of PdAu@rGO-1 with different molar ratio (A) 2:1 (B) 1:1.



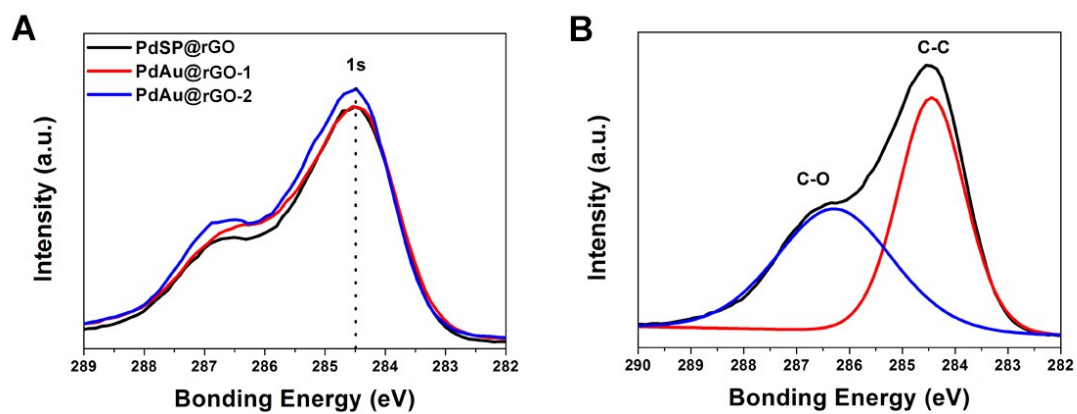

**Fig. S6** (A) XPS spectra of the PdSP@rGO, PdAu@rGO-1 and PdAu@rGO-2 for C 1s orbital and (B) split XPS spectrum of C 1s orbital for the PdAu@rGO-1.

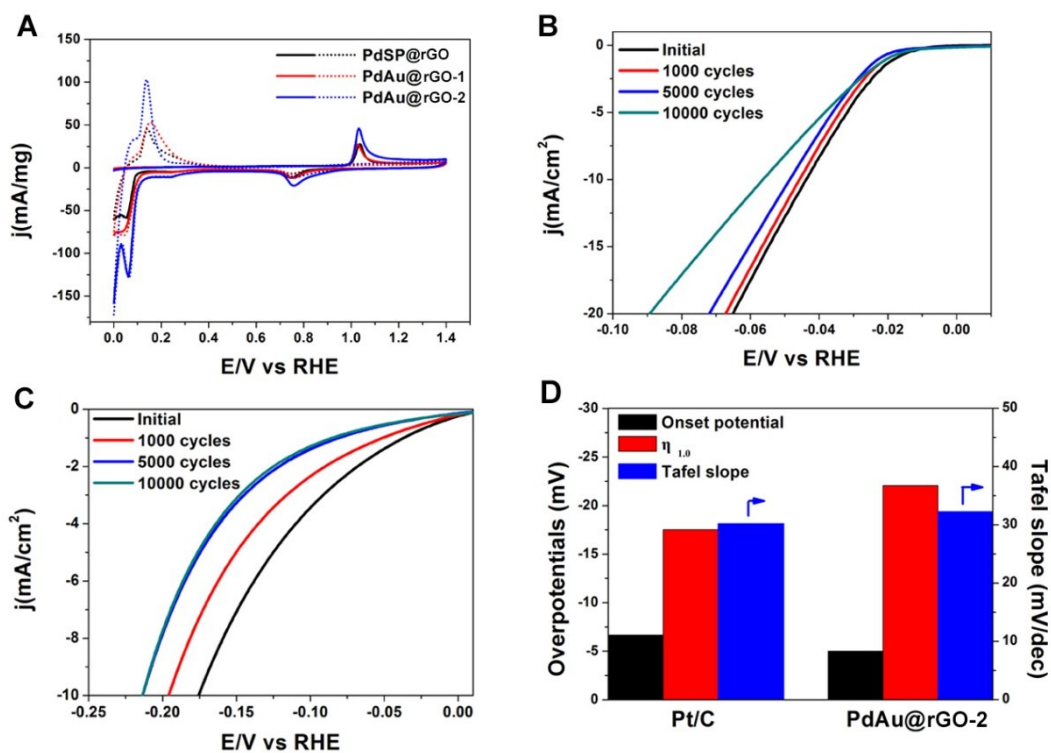

**Fig. S7** (A) CO stripping curves for the PdSP@rGO, PdAu@rGO-1 and PdAu@rGO-2. The solid and dot lines represent the first and second cycle, respectively. LSV plots of (B) commercial Pt/C and (C) PdAu@rGO-1 after 1000, 5000, and 10000 CV cycles including the initial one. (D) changes of HER performance of Pt/C and PdAu@rGO-2 after 5000 CV cycles recorded in a 0.5 M H<sub>2</sub>SO<sub>4</sub> electrolyte.



**Table. S1** Summarized HER performance of commercial Pt/C, PdSP@rGO, PdAu@rGO-1 and PdAu@rGO-2

| <b>samples</b>    | <b>Onset potential<br/>(mV)</b> | <b>Tafel slopes<br/>(mV/dec)</b> | <b><math>j_0</math><br/>(mA/cm<sup>2</sup>)</b> | <b><math>\eta_{1.0}</math><br/>(mV)</b> |
|-------------------|---------------------------------|----------------------------------|-------------------------------------------------|-----------------------------------------|
| <b>Pt/C</b>       | 6.68                            | 30.23                            | 0.75                                            | 17.51                                   |
| <b>PdSP@rGO</b>   | 36.87                           | 86.97                            | 0.24                                            | 72.32                                   |
| <b>PdAu@rGO-1</b> | 14.1                            | 55.77                            | 0.38                                            | 35.32                                   |
| <b>PdAu@rGO-2</b> | 13.06                           | 44.35                            | 0.52                                            | 31.87                                   |

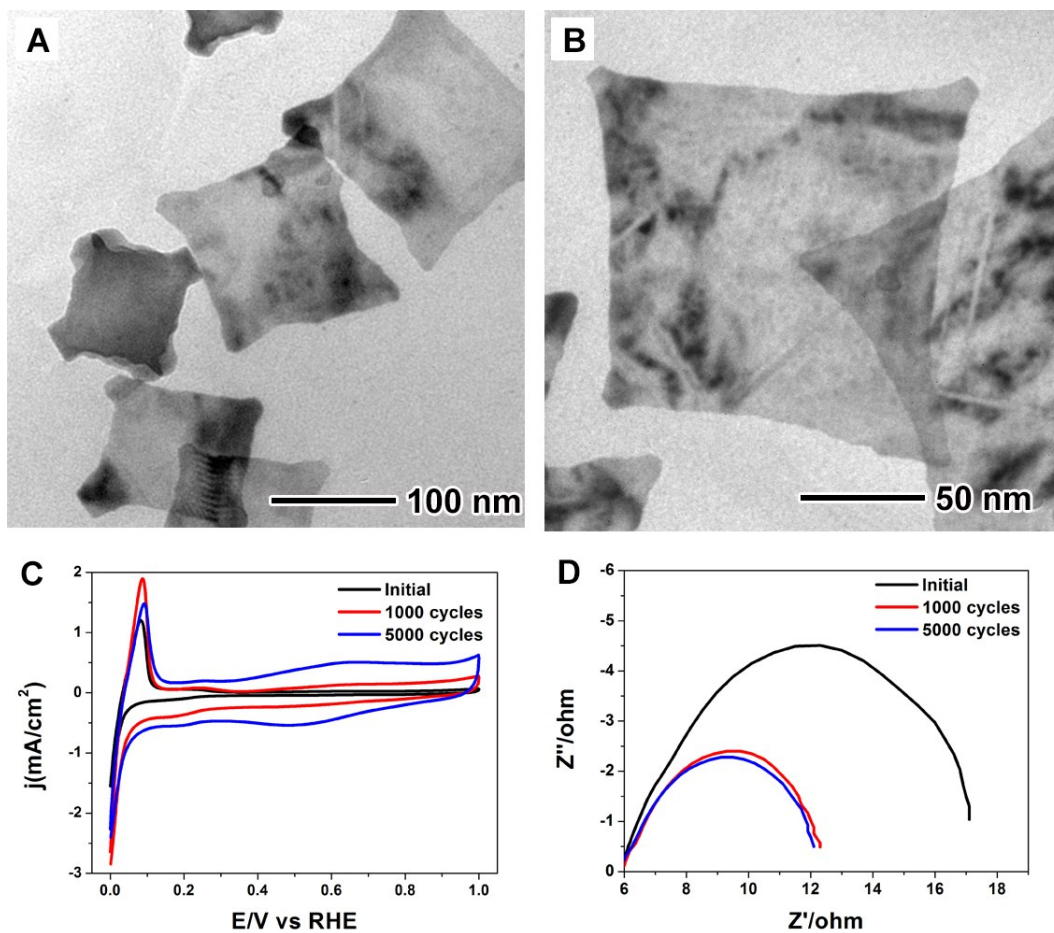

**Fig. S8** TEM images of PdAu@rGO-2 after (A) 1000 and (B) 5000 CV cycles and the corresponding (C) CV and (D) EIS plots.
